# Supplementary material
Source: PubMed Central journal article supplement (PMC3040659)
Supplement: pgen.1001308.s001.pdf [file pgen.1001308.s001.pdf]

5220 Genotyped Samples

### NIA-LOAD

607 Families \*  
• 1512 affected  
• 1306 unaffected  
• 400 with unknown or intermediate phenotype  
262 singleton cases #  
794 unrelated unaffected controls  
90 unrelated samples with intermediate phenotypes

### NCRAD

138 Families \*  
• 337 affected  
• 166 with unknown or intermediate phenotypes  
209 singleton cases #  
144 unrelated unaffected controls

Excluded:  
134 multiplex families  
African American, n=178  
Hispanic, n=300  
Other racial/ethnic group clusters, n=332  
Additional individuals with unknown phenotype, n=571

NIA-LOAD & NCRAD GWAS Analytical Sample  
(European, white, non-Hispanic)  
Families n=611 multiplex; n=381 singletons  
Affecteds n=1848  
Unaffected & Unrelated controls n=1991

\*Some of these families were previously included in either:  
Bertram L, et al. 2008  
Carrasquillo MM, et al. 2009

# patients with a documented family history of LOAD without other family members
