# Supplementary material
Source: PubMed Central journal article supplement (PMC3040659)
Supplement: pgen.1001308.s002.pdf [file pgen.1001308.s002.pdf]

Linkage disequilibrium among SNPs in CUGBP2, among unrelated, unaffected subjects.

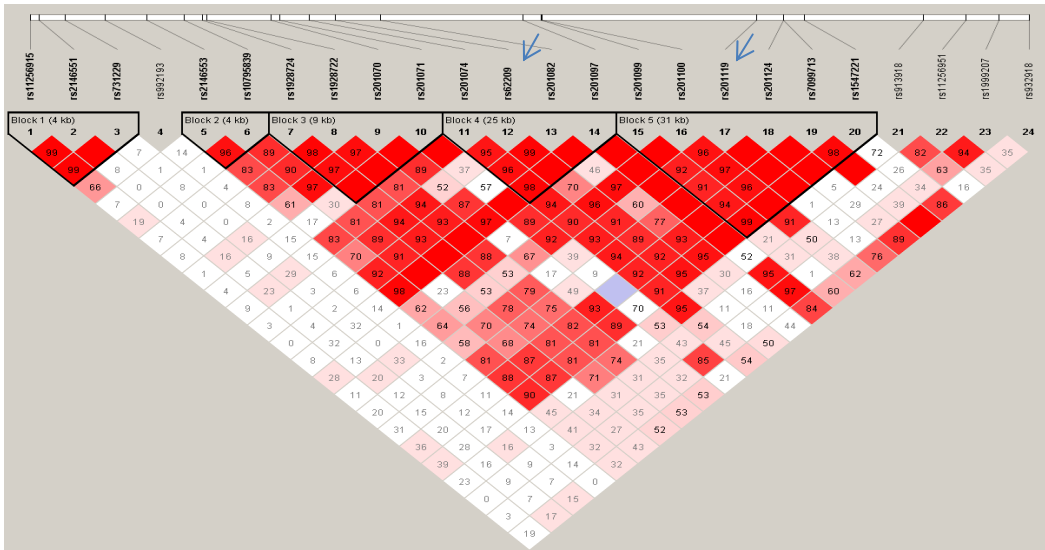

NIA LOAD/NCRAD  
European Americans

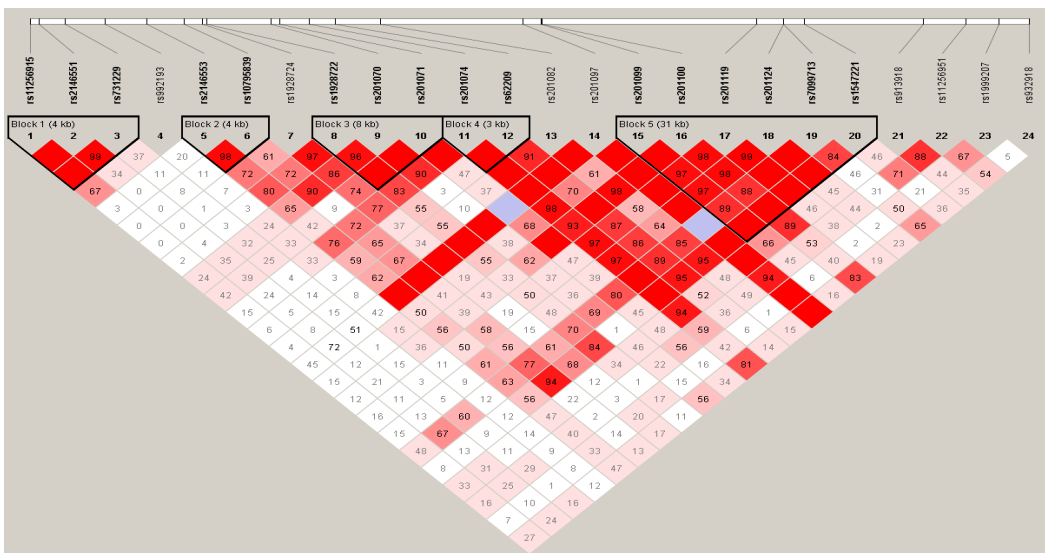

Caribbean Hispanics

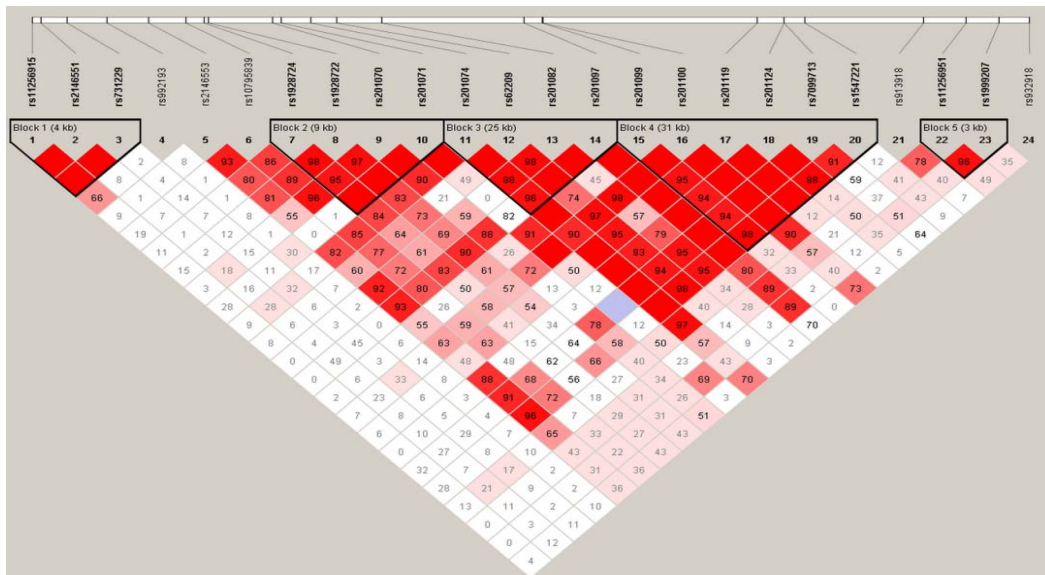

Washington  
University/ADNI  
European Americans
