# Supplementary material
Source: PubMed Central journal article supplement (PMC3040659)

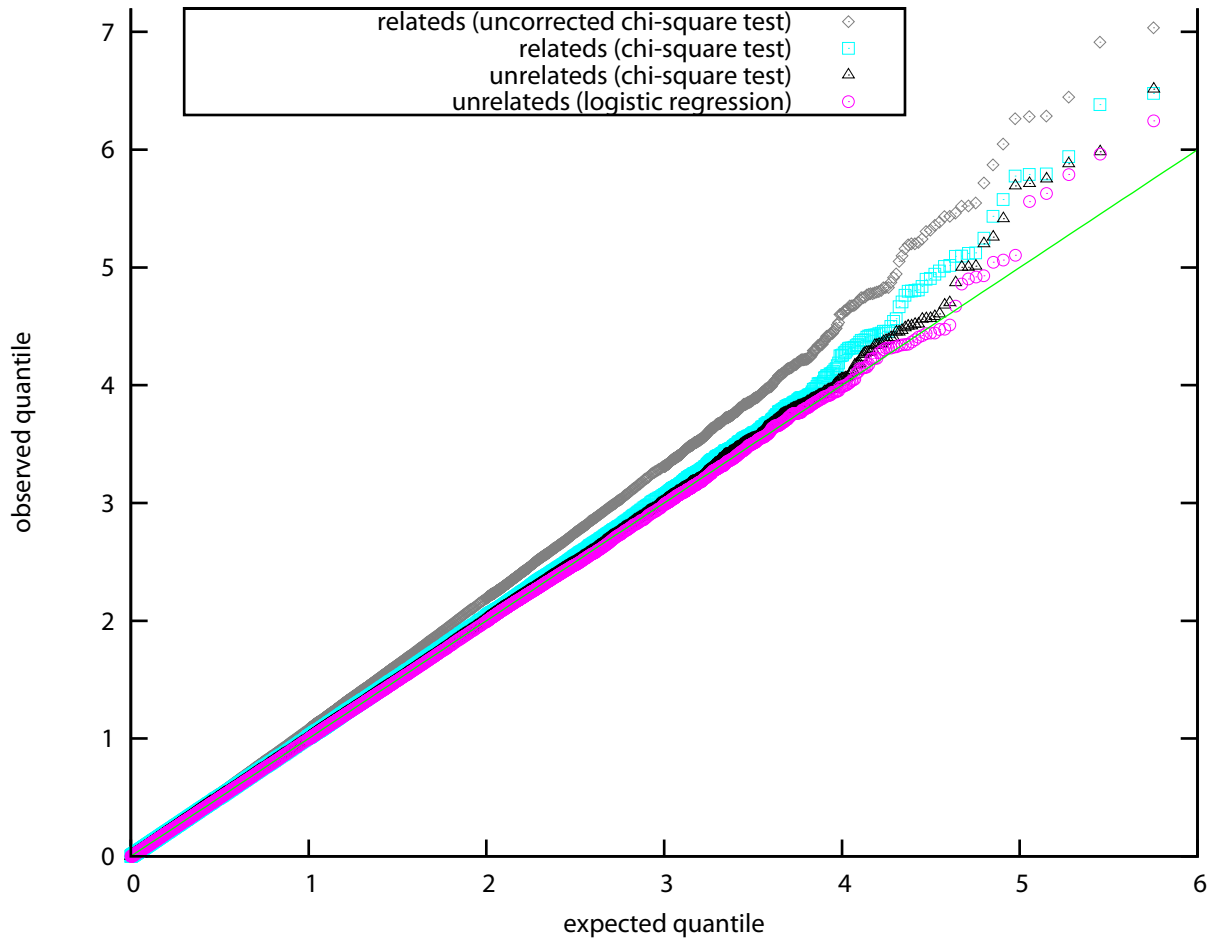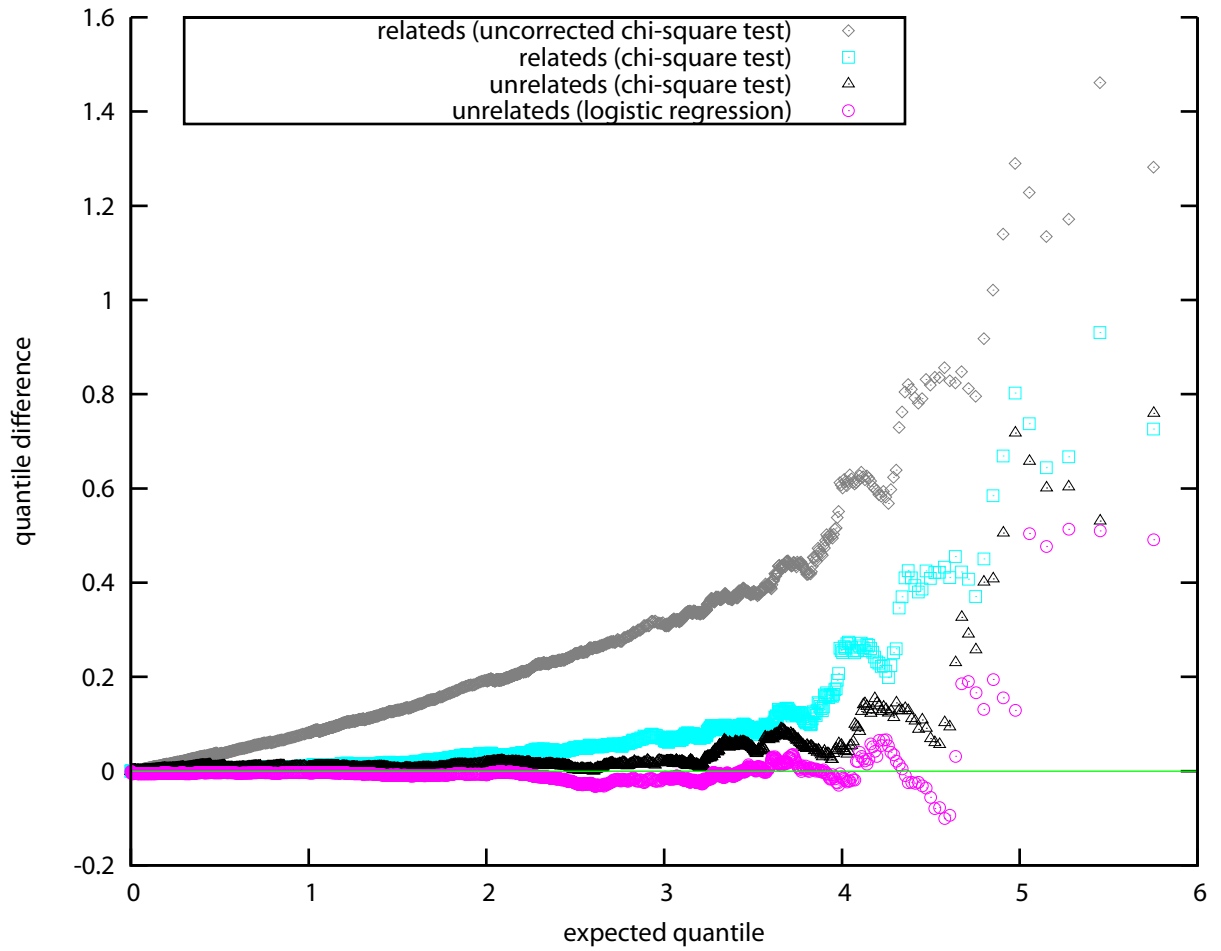

Supplement: pgen.1001308.s003.pdf [file pgen.1001308.s003.pdf]

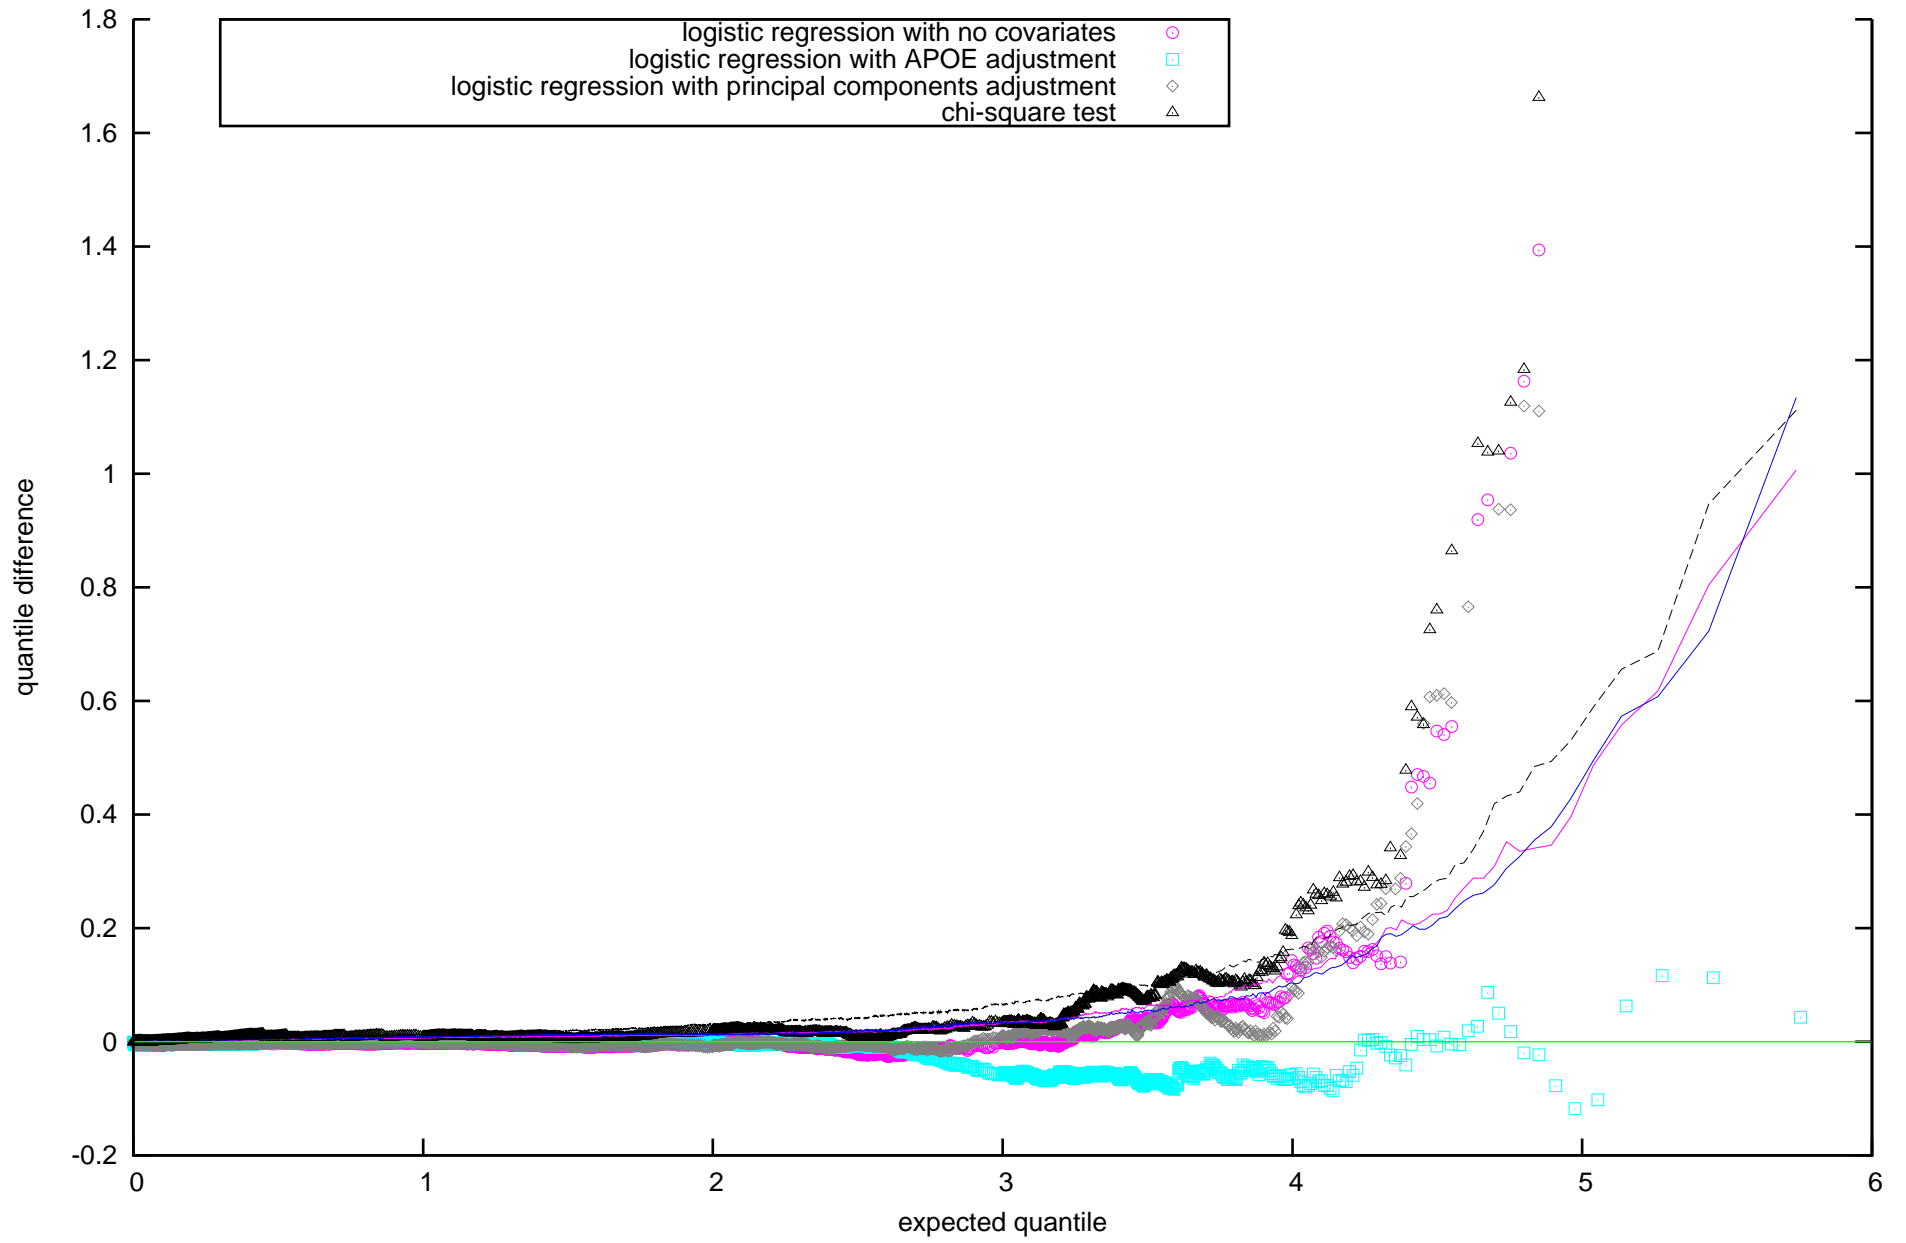

Supplement: pgen.1001308.s004.pdf [file pgen.1001308.s004.pdf]
